# Supplementary material for: Recent Advances in the Detection of Antibiotic and Multi-Drug Resistant Salmonella: An Update
Source: PubMed Central journal article supplement (PMC8037659; doi:10.3390/ijms22073499), 2021-03-28
Supplement: ijms-22-03499-s001.pdf [file ijms-22-03499-s001.pdf]

Table S1. Antibiotic resistant genes found by the CDC in eighteen Salmonella species sourced from food products (poultry, swine, beef) and humans.

| Antibiotic                     | Resistant Genes                                                    | Salmonella spp                                                                                                                                               |
|--------------------------------|--------------------------------------------------------------------|--------------------------------------------------------------------------------------------------------------------------------------------------------------|
| Quinolone                      | PMQR genes (oqxAB, aac (6')-Ib-cr), marRAB, soxRS, qnr, qepA       | S. Typhimurium                                                                                                                                               |
| Fluoroquinolone                | gyr A, gyr B, A, topoisomerase IV                                  | S. Typhimurium DT104                                                                                                                                         |
| Gentamicin                     | aac, aadB, aac                                                     | S. Typhimurium                                                                                                                                               |
| Streptomycin                   | strA/strB, aph(3)-Ib, aph (6)-Id                                   | S. Typhimurium, S. Typhimurium DT204, S. Muenchen, S. Newport                                                                                                |
| Amoxicillin-Clavulanic Acid    | blaCMY                                                             | S. Kentucky, S. Typhimurium DT104, S. Newport                                                                                                                |
| Ceftiofur                      | blaCMY, blaCTX-M, blaCMY                                           | S. Enteritidis, S. Infantis, S. Typhimurium, S. Heidelberg.                                                                                                  |
| Ceftriaxone                    | blaCMY                                                             | S. Enteritidis, S. Infantis, S. Typhimurium, S. Heidelberg.                                                                                                  |
| Sulfamethoxazole/Sulfisoxazole | sul1, sul2, sul 3                                                  | S. Bredeney, S. Kentucky, S. Enteritidis, S. Typhimurium, S. Muenchen, S. Newport, S. Hadar                                                                  |
| Azithromycin*                  | AcrB*                                                              | S. Paratyphi A                                                                                                                                               |
| Ampicillin                     | blaTEM, blaCMY, blaHERA                                            | S. Kentucky, S. Typhimurium DT104, S. Muenchen, S. Newport,                                                                                                  |
| Chloramphenicol                | cat1, cat2, gyrA, qnrS, floR                                       | S. Typhimurium DT104, S. Muenchen, S. Newport                                                                                                                |
| Ciprofloxacin                  | qnrS                                                               | S. Poona                                                                                                                                                     |
| Nalidixic acid                 | qnrS                                                               | S. Poona                                                                                                                                                     |
| Tetracycline& Oxytetracycline  | tetA, tetB, tetC, tetD, tetG, tetH, tetO, tetS, tetX, tetW, tet32, | S. Bredeney, S. Kentucky, S. Enteritidis, S. Typhimurium, S. Newport. S. Typhimurium DT104, S. Muenchen, S. Dublin, S. Agona, S. Choleraesuis, S. Heidelberg |
| Trimethoprim-sulfamethoxazole  | dfrA                                                               | S. Typhimurium, S. Typhimurium DT104, S. Newport                                                                                                             |
| Cefotaxime                     | blaTEM, blaSHV-1                                                   | S. Typhimurium                                                                                                                                               |
